# Supplementary material
Source: Springer Nature journal article supplement (https://www.springerprofessional.de/resource/supplementary/13638_2014_1022_MOESM1_ESM.pdf/11899068)
Supplement: MOESM1 [file 11899068]

(a)

Typical Utility Daily Curve

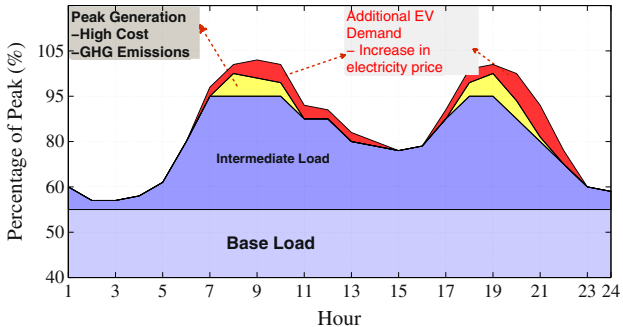

Impacts of electric vehicle penetration on power generation.

(b)

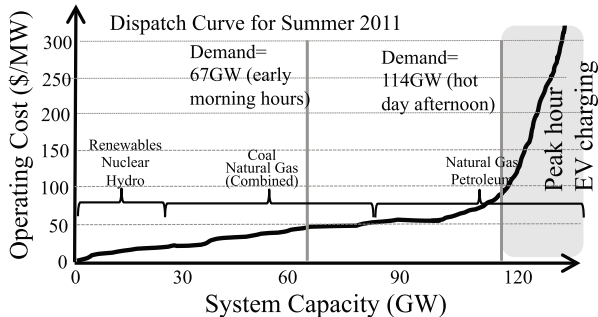

System operating cost.
